# Supplementary material for: Facile synthesis of dendrimer like mesoporous silica nanoparticles to enhance targeted delivery of interleukin-22
Source: Royal Society of Chemistry journal article supplement (doi:10.1039/d1bm01352a), 2021-01-01
Supplement: d1bm01352a1.pdf [file d1bm01352a1.pdf]

## **Facile synthesis of dendrimer like mesoporous silica nanoparticles to enhance targeted delivery of interleukin-22**

Dana Elshaer<sup>b,c§</sup>, Md. Moniruzzaman<sup>a,b,c§</sup>, Yi Theng Ong<sup>a</sup>, Zhi Qu<sup>a</sup>, Veronika Schreiber<sup>b</sup>, Jakob Begun<sup>b,c,\*</sup>, Amirali Popat<sup>a,\*</sup>

<sup>a</sup> School of Pharmacy, The University of Queensland, Brisbane, QLD 4102, Australia

<sup>b</sup> Inflammatory Bowel Disease Group, Mater Research Institute – The University of Queensland, Translational Research Institute, Woolloongabba, QLD 4102, Australia.

<sup>c</sup> Faculty of Medicine, The University of Queensland, Brisbane, QLD 4072, Australia

<sup>§</sup>Equal contribution first authors. Names are ordered alphabetically.

\* Author should be corresponds to Associate Professor Jakob Begun, Inflammatory Bowel Disease Group, Mater Research Institute – The University of Queensland, Translational Research Institute, Woolloongabba, QLD 4102, Australia; E-mail: [Jakob.begun@mater.uq.edu.au](mailto:Jakob.begun@mater.uq.edu.au); and Associate Professor Amirali Popat; School of Pharmacy, The University of Queensland, Brisbane, QLD 4102, Australia; E-mail: [a.popat@uq.edu.au](mailto:a.popat@uq.edu.au)

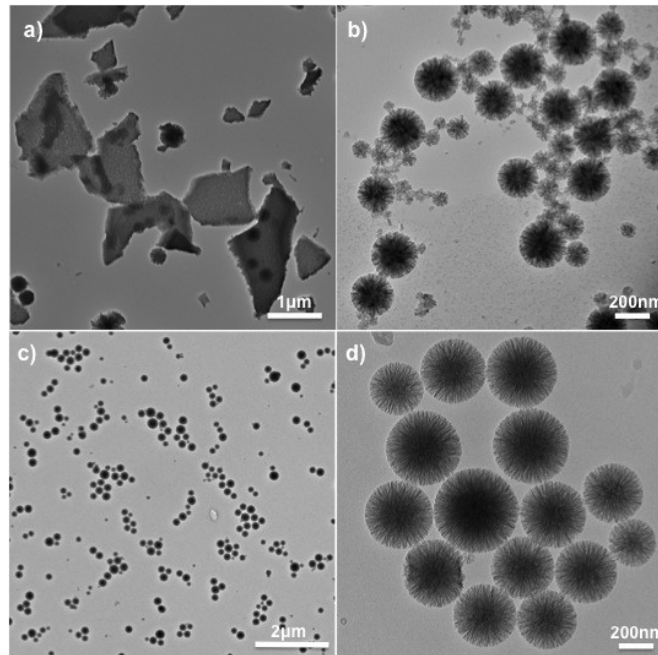

**Supplementary Fig. 1** TEM images of a) LPMSNSQ pallet b) LPMSNSQ gradient centrifugation final product and c) and d) LPMSNSQ with our optimized protocol.

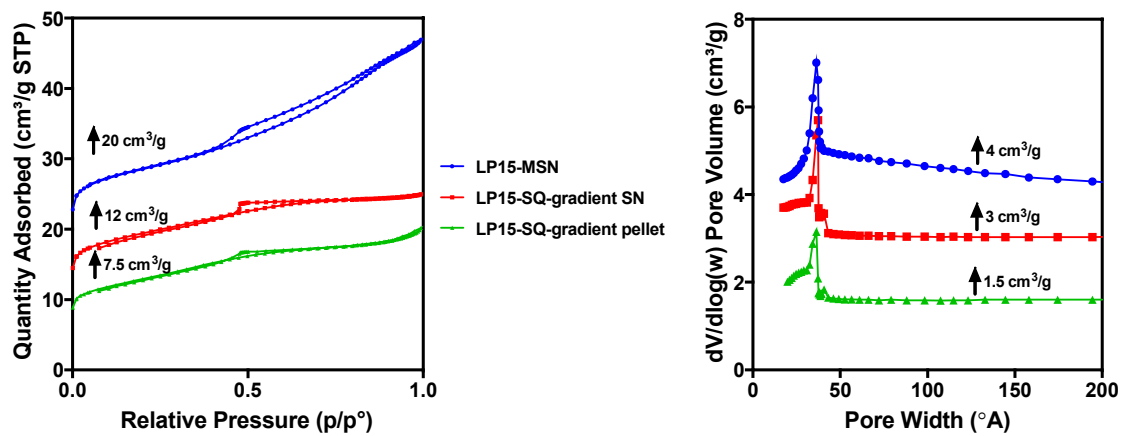

**Supplementary Fig. 2** N<sub>2</sub> sorption analysis of different porous materials prepared by Qiao et.al method (LP15-SQ-Gradient SN, LP15-SQ-Gradient pellet) and our modified protocol (LPMSN).

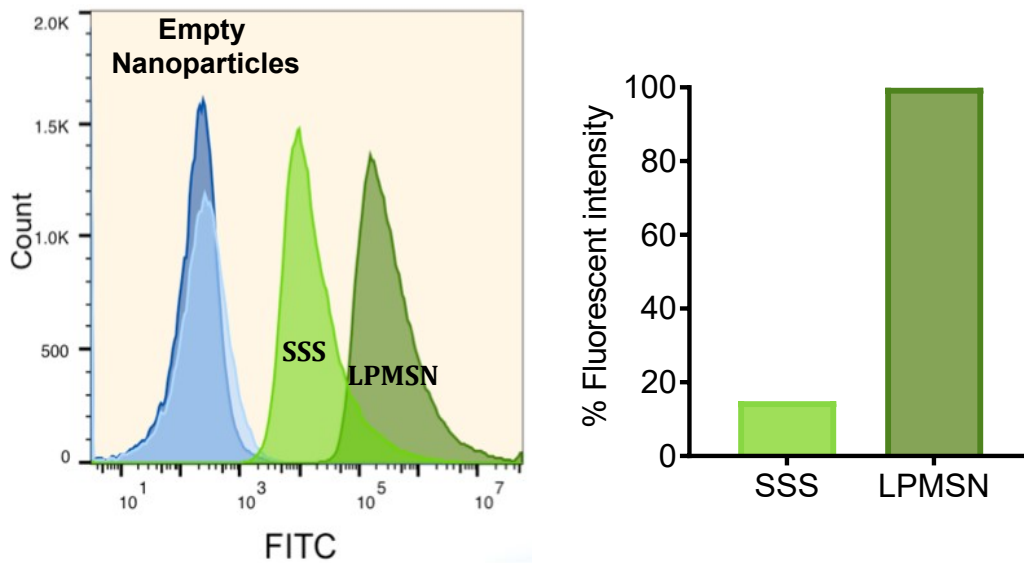

**Supplementary Fig. 3** Flow cytometry shows a 100-fold increase in fluorescent intensity in LPMSNs loaded with FITC-BSA compared to Solid silica spheres (SSS) loaded with FITC-BSA and used as a control. Results are based on 1 mg of FITC-BSA (1 mg/ml) loaded into 5 mg of nanoparticles (5 mg/ml). Fluorescence histogram and corresponding loading percentage (n=3) measured using fluorescent plate reader (excitation 485 nm, emission 535 nm) is shown.

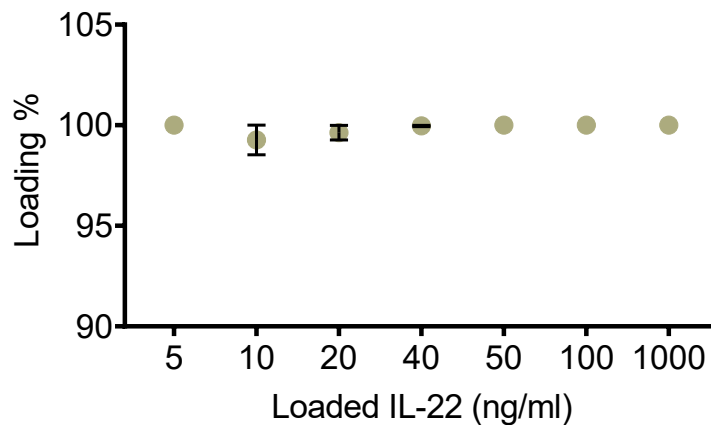

**Supplementary Fig. 4** IL-22 loading into LPMSNs. Various concentrations of human IL-22 loaded into LPMSNs. Loading efficiencies were determined by ELISA assay of supernatants after loading using human IL-22 standard. Loading percentage is measured (n=6). In all samples, IL-22 is loaded with 0.5 mg of BSA (0.5mg/ml).
